# Supplementary material for: Prediction of the targets of the main components in blood after oral administration ofXanthii Fructus: a network pharmacology study
Source: Royal Society of Chemistry journal article supplement (doi:10.1039/c8ra00186c), 2018-01-01
Supplement: c8ra00186c1.pdf [file c8ra00186c1.pdf]

The raw data was shown in the following table 1-3. The potential protein got from PharmMapper database was shown in table1. Then the potential protein was imported to Reactome database and the protein pathway was collected, the result was shown in table2. The component, protein and pathway were collected together before imported into the cytoscape software, the collected data was shown in table3.

Table1 Data got from PharmMapper database

| <u>component</u> | <u>protein</u> |
|------------------|----------------|
| cleomiscosin A   | P06276         |
| cleomiscosin A   | P23141         |
| cleomiscosin A   | P62937         |
| cleomiscosin A   | P00918         |
| cleomiscosin A   | P24941         |
| cleomiscosin A   | P07339         |
| cleomiscosin A   | P03372         |
| cleomiscosin A   | Q15078         |
| cleomiscosin A   | P00915         |
| cleomiscosin A   | P04062         |
| cleomiscosin A   | P11309         |
| cleomiscosin A   | P00491         |
| cleomiscosin A   | Q9NP99         |
| cleomiscosin A   | O14965         |
| cleomiscosin A   | Q16539         |
| cleomiscosin A   | Q92731         |
| cleomiscosin A   | Q07343         |
| cleomiscosin A   | O14757         |
| cleomiscosin A   | P45983         |
| cleomiscosin A   | P08758         |
| myristic acid    | P12643         |
| myristic acid    | P28482         |
| myristic acid    | P09211         |
| myristic acid    | P15121         |
| myristic acid    | P49137         |
| myristic acid    | P10828         |
| myristic acid    | P11309         |
| myristic acid    | P27338         |
| myristic acid    | P62937         |
| myristic acid    | P02774         |
| myristic acid    | P02768         |
| myristic acid    | P52732         |
| myristic acid    | P02652         |
| myristic acid    | P00918         |
| myristic acid    | P08842         |
| myristic acid    | P02766         |

|               |        |
|---------------|--------|
| myristic acid | Q14994 |
| myristic acid | P37231 |
| myristic acid | P30044 |
| succinic acid | P09012 |
| succinic acid | P02743 |
| succinic acid | P12931 |
| succinic acid | O15382 |
| succinic acid | P18031 |
| succinic acid | P15086 |
| succinic acid | P07360 |
| succinic acid | P02788 |
| succinic acid | P03950 |
| succinic acid | P07195 |
| succinic acid | P23368 |
| succinic acid | Q9P2W7 |
| succinic acid | P35558 |
| succinic acid | P35520 |
| succinic acid | P12821 |
| succinic acid | P09871 |
| succinic acid | P00439 |
| succinic acid | P14324 |
| succinic acid | P50613 |
| succinic acid | P12724 |
| xanthosine    | Q9BW91 |
| xanthosine    | P37173 |
| xanthosine    | P04062 |
| xanthosine    | O14965 |
| xanthosine    | Q13126 |
| xanthosine    | P00533 |
| xanthosine    | P24941 |
| xanthosine    | Q07343 |
| xanthosine    | P00915 |
| xanthosine    | Q12884 |
| xanthosine    | O14757 |
| xanthosine    | Q05315 |
| xanthosine    | P04745 |
| xanthosine    | P18075 |
| xanthosine    | P03950 |
| xanthosine    | P00491 |
| xanthosine    | P29218 |
| xanthosine    | Q99933 |
| xanthosine    | P19367 |
| xanthosine    | P17707 |
| Sitostenone   | P52895 |

|             |        |
|-------------|--------|
| Sitostenone | P49137 |
| Sitostenone | P55210 |
| Sitostenone | P12643 |
| Sitostenone | P08842 |
| Sitostenone | P27338 |
| Sitostenone | P02774 |
| Sitostenone | P11309 |
| Sitostenone | P02768 |
| Sitostenone | P28482 |
| Sitostenone | P45452 |
| Sitostenone | P10828 |
| Sitostenone | P52732 |
| Sitostenone | P00918 |
| Sitostenone | P14061 |
| Sitostenone | P02652 |
| Sitostenone | P08235 |
| Sitostenone | P06401 |
| Sitostenone | P10275 |
| Sitostenone | P02766 |

Table2 Data got from Reactome database

| protein                                                                                                                | pathway                                                |
|------------------------------------------------------------------------------------------------------------------------|--------------------------------------------------------|
| P37231;P10828;Q92731;P03372;P10275;P06401;P08235                                                                       | Nuclear Receptor transcription pathway                 |
| Q16539;P28482;P45983                                                                                                   | Activation of the AP-1 family of transcription factors |
| Q16539;P28482;P45983;P49137                                                                                            | MAPK targets/ Nuclear events mediated by MAP kinases   |
| Q16539;P12931;P49137                                                                                                   | p38MAPK events                                         |
| Q16539;P10828;P28482;P50613;P12643;P12931;P10275;P37231;Q92731;P24941;P45452;P03372;P06401;P08235;O14757;O14965;Q15078 | Generic Transcription Pathway                          |
| P28482;P12643;P45452;P03372;P12931;P10275                                                                              | Transcriptional regulation by RUNX2                    |
| Q16539;P12931;P49137                                                                                                   | Signalling to RAS                                      |
| Q16539;P10828;P28482;P50613;P12643;P12931;P10275;P37231;Q92731;P24941;P45452;P03372;P06401;P08235;O14757;O14965;Q15078 | RNA Polymerase II Transcription                        |
| Q16539;P24941;O14757;Q15078;O14965                                                                                     | Regulation of TP53 Activity through Phosphorylation    |

---

|                                                                                                                                                                                                            |                                                                                    |
|------------------------------------------------------------------------------------------------------------------------------------------------------------------------------------------------------------|------------------------------------------------------------------------------------|
| O15382;P52895;P00491;P35558;Q9BW91;P14061;P07195;P04062;P02768;P17707;P02766;P49137;P09211;P08842;Q13126;P23141;P35520;Q9P2W7;P14324;P19367;P00918;P37231;P00915;P15121;P06276;P29218;P02774;P27338;P02652 | Metabolism                                                                         |
| Q16539;P28482;P49137                                                                                                                                                                                       | Nuclear Events (kinase and transcription factor activation)                        |
| P28482;P12931;P10275                                                                                                                                                                                       | RUNX2 regulates osteoblast differentiation                                         |
| P52895;P15121;P14061;P02768;P14324;P02774                                                                                                                                                                  | Metabolism of steroids                                                             |
| Q16539;P28482;P45983;P49137                                                                                                                                                                                | MAP kinase activation in TLR cascade                                               |
| P00915;P00918                                                                                                                                                                                              | Erythrocytes take up oxygen and release carbon dioxide                             |
| P28482;P12931;P10275                                                                                                                                                                                       | RUNX2 regulates bone development                                                   |
| Q16539;P12931;P49137                                                                                                                                                                                       | Signalling to ERKs                                                                 |
| Q16539;P10828;P28482;P50613;P12643;P12931;P10275;P37231;Q92731;P24941;P45452;P03372;P06401;P08235;O14757;O14965;Q15078                                                                                     | Gene expression (Transcription)                                                    |
| Q16539;P28482;P45983;P49137                                                                                                                                                                                | Interleukin-17 signaling                                                           |
| P04745                                                                                                                                                                                                     | Digestion of dietary carbohydrate                                                  |
| Q13126;P00915;P62937                                                                                                                                                                                       | Gene and protein expression by JAK-STAT signaling after Interleukin-12 stimulation |
| Q16539;P45983                                                                                                                                                                                              | DSCAM interactions                                                                 |
| Q16539;P28482;P12931;P49137                                                                                                                                                                                | NGF signalling via TRKA from the plasma membrane                                   |
| P00915;P00918                                                                                                                                                                                              | Reversible hydration of carbon dioxide                                             |
| P00915;P00918                                                                                                                                                                                              | O <sub>2</sub> /CO <sub>2</sub> exchange in erythrocytes                           |
| P00915;P00918                                                                                                                                                                                              | Erythrocytes take up carbon dioxide and release oxygen                             |
| Q16539;P28482;P24941;P45983;P49137;P09211;P10275;P06401;P08235                                                                                                                                             | Cellular responses to stress                                                       |
| Q16539;P28482;P45983;P49137                                                                                                                                                                                | MyD88 cascade initiated on plasma membrane                                         |
| Q16539;P28482;P45983;P49137                                                                                                                                                                                | Toll Like Receptor 10 (TLR10) Cascade                                              |
| Q16539;P28482;P45983;P49137                                                                                                                                                                                | Toll Like Receptor 5 (TLR5) Cascade                                                |
| Q16539;P28482;P45983;P49137                                                                                                                                                                                | TRAF6 mediated induction of NFκB and MAP kinases upon TLR7/8 or 9 activation       |
| P08758;Q16539;P62937;P28482;P18031;P02768;P12931                                                                                                                                                           | Platelet activation, signaling and aggregation                                     |
| Q16539;P28482;P45983;P49137                                                                                                                                                                                | Oxidative Stress Induced Senescence                                                |
| Q16539;P28482;P45983;P49137                                                                                                                                                                                | MyD88 dependent cascade initiated on                                               |

---

---

|                                                                |                                                            |
|----------------------------------------------------------------|------------------------------------------------------------|
| Q16539;P28482;P45983;P49137                                    | endosome                                                   |
| Q16539;P28482;P45983;P49137                                    | Toll Like Receptor 7/8 (TLR7/8) Cascade                    |
|                                                                | MyD88:Mal cascade initiated on plasma membrane             |
| Q16539;P28482;P45983;P49137                                    | Toll Like Receptor TLR6:TLR2 Cascade                       |
| P28482;P12931                                                  | Spry regulation of FGF signaling                           |
| Q16539;P45983;P12931                                           | Netrin-1 signaling                                         |
| Q16539;P28482;P45983;P49137                                    | Toll Like Receptor 9 (TLR9) Cascade                        |
| Q16539;P28482;P45983;P49137                                    | Toll Like Receptor 3 (TLR3) Cascade                        |
| Q16539;P28482;P45983;P49137                                    | Toll Like Receptor TLR1:TLR2 Cascade                       |
| Q16539;P28482;P45983;P49137                                    | Toll Like Receptor 2 (TLR2) Cascade                        |
| Q16539;P28482;P45983;P49137                                    | TRIF(TICAM1)-mediated TLR4 signaling                       |
| Q16539;P28482;P45983;P49137                                    | MyD88-independent TLR4 cascade                             |
| P19367                                                         | Defective HK1 causes hexokinase deficiency (HK deficiency) |
| P15086;P12821                                                  | Metabolism of Angiotensinogen to Angiotensins              |
| Q16539;P24941;O14757;Q15078;O14965                             | Regulation of TP53 Activity                                |
| Q16539;P28482;P18031;P45983;P03372;P49137;P12931;O14757;P06401 | Signaling by Receptor Tyrosine Kinases                     |
| Q16539;P28482;P24941;P45983;P49137                             | Cellular Senescence                                        |
| P10275;P08235;P06401                                           | HSP90 chaperone cycle for steroid hormone receptors (SHR)  |
| Q13126;P00915;P62937                                           | Interleukin-12 family signaling                            |

---

Table 3 Data imported to cytoscape

| componet-protein | protein-pathway |
|------------------|-----------------|
| cleomiscosin A   | P06276          |
| cleomiscosin A   | P23141          |
| cleomiscosin A   | P62937          |
| cleomiscosin A   | P00918          |
| cleomiscosin A   | P24941          |
| cleomiscosin A   | P07339          |
| cleomiscosin A   | P03372          |
| cleomiscosin A   | Q15078          |
| cleomiscosin A   | P00915          |
| cleomiscosin A   | P04062          |
| cleomiscosin A   | P11309          |
| cleomiscosin A   | P00491          |
| cleomiscosin A   | Q9NP99          |
| cleomiscosin A   | O14965          |
| cleomiscosin A   | Q16539          |
| cleomiscosin A   | Q92731          |
| cleomiscosin A   | Q07343          |
| cleomiscosin A   | O14757          |
| cleomiscosin A   | P45983          |
| cleomiscosin A   | P08758          |
| myristic acid    | P12643          |
| myristic acid    | P28482          |
| myristic acid    | P09211          |
| myristic acid    | P15121          |
| myristic acid    | P49137          |
| myristic acid    | P10828          |
| myristic acid    | P11309          |
| myristic acid    | P27338          |
| myristic acid    | P62937          |
| myristic acid    | P02774          |
| myristic acid    | P02768          |
| myristic acid    | P52732          |
| myristic acid    | P02652          |
| myristic acid    | P00918          |
| myristic acid    | P08842          |
| myristic acid    | P02766          |
| myristic acid    | Q14994          |
| myristic acid    | P37231          |
| myristic acid    | P30044          |
| succinic acid    | P09012          |
| succinic acid    | P02743          |

|               |        |
|---------------|--------|
| succinic acid | P12931 |
| succinic acid | O15382 |
| succinic acid | P18031 |
| succinic acid | P15086 |
| succinic acid | P07360 |
| succinic acid | P02788 |
| succinic acid | P03950 |
| succinic acid | P07195 |
| succinic acid | P23368 |
| succinic acid | Q9P2W7 |
| succinic acid | P35558 |
| succinic acid | P35520 |
| succinic acid | P12821 |
| succinic acid | P09871 |
| succinic acid | P00439 |
| succinic acid | P14324 |
| succinic acid | P50613 |
| succinic acid | P12724 |
| xanthosine    | Q9BW91 |
| xanthosine    | P37173 |
| xanthosine    | P04062 |
| xanthosine    | O14965 |
| xanthosine    | Q13126 |
| xanthosine    | P00533 |
| xanthosine    | P24941 |
| xanthosine    | Q07343 |
| xanthosine    | P00915 |
| xanthosine    | Q12884 |
| xanthosine    | O14757 |
| xanthosine    | Q05315 |
| xanthosine    | P04745 |
| xanthosine    | P18075 |
| xanthosine    | P03950 |
| xanthosine    | P00491 |
| xanthosine    | P29218 |
| xanthosine    | Q99933 |
| xanthosine    | P19367 |
| xanthosine    | P17707 |
| Sitostenone   | P52895 |
| Sitostenone   | P49137 |
| Sitostenone   | P55210 |
| Sitostenone   | P12643 |
| Sitostenone   | P08842 |
| Sitostenone   | P27338 |

|             |        |
|-------------|--------|
| Sitostenone | P02774 |
| Sitostenone | P11309 |
| Sitostenone | P02768 |
| Sitostenone | P28482 |
| Sitostenone | P45452 |
| Sitostenone | P10828 |
| Sitostenone | P52732 |
| Sitostenone | P00918 |
| Sitostenone | P14061 |
| Sitostenone | P02652 |
| Sitostenone | P08235 |
| Sitostenone | P06401 |
| Sitostenone | P10275 |
| Sitostenone | P02766 |
| P37231      | Pw1    |
| P10828      | Pw1    |
| Q92731      | Pw1    |
| P03372      | Pw1    |
| P10275      | Pw1    |
| P06401      | Pw1    |
| P08235      | Pw1    |
| Q16539      | Pw2    |
| P28482      | Pw2    |
| P45983      | Pw2    |
| Q16539      | Pw3    |
| P28482      | Pw3    |
| P45983      | Pw3    |
| P49137      | Pw3    |
| Q16539      | Pw4    |
| P12931      | Pw4    |
| P49137      | Pw4    |
| Q16539      | Pw5    |
| P10828      | Pw5    |
| P28482      | Pw5    |
| P50613      | Pw5    |
| P12643      | Pw5    |
| P12931      | Pw5    |
| P10275      | Pw5    |
| P37231      | Pw5    |
| Q92731      | Pw5    |
| P24941      | Pw5    |
| P45452      | Pw5    |
| P03372      | Pw5    |
| P06401      | Pw5    |



|        |      |
|--------|------|
| P08235 | Pw5  |
| O14757 | Pw5  |
| O14965 | Pw5  |
| Q15078 | Pw5  |
| P28482 | Pw6  |
| P12643 | Pw6  |
| P45452 | Pw6  |
| P03372 | Pw6  |
| P12931 | Pw6  |
| P10275 | Pw6  |
| Q16539 | Pw7  |
| P12931 | Pw7  |
| P49137 | Pw7  |
| Q16539 | Pw8  |
| P10828 | Pw8  |
| P28482 | Pw8  |
| P50613 | Pw8  |
| P12643 | Pw8  |
| P12931 | Pw8  |
| P10275 | Pw8  |
| P37231 | Pw8  |
| Q92731 | Pw8  |
| P24941 | Pw8  |
| P45452 | Pw8  |
| P03372 | Pw8  |
| P06401 | Pw8  |
| P08235 | Pw8  |
| O14757 | Pw8  |
| O14965 | Pw8  |
| Q15078 | Pw8  |
| Q16539 | Pw9  |
| P24941 | Pw9  |
| O14757 | Pw9  |
| Q15078 | Pw9  |
| O14965 | Pw9  |
| O15382 | Pw10 |
| P52895 | Pw10 |
| P00491 | Pw10 |
| P35558 | Pw10 |
| Q9BW91 | Pw10 |
| P14061 | Pw10 |
| P07195 | Pw10 |
| P04062 | Pw10 |
| P02768 | Pw10 |

|        |      |
|--------|------|
| P17707 | Pw10 |
| P02766 | Pw10 |
| P49137 | Pw10 |
| P09211 | Pw10 |
| P08842 | Pw10 |
| Q13126 | Pw10 |
| P23141 | Pw10 |
| P35520 | Pw10 |
| Q9P2W7 | Pw10 |
| P14324 | Pw10 |
| P19367 | Pw10 |
| P00918 | Pw10 |
| P37231 | Pw10 |
| P00915 | Pw10 |
| P15121 | Pw10 |
| P06276 | Pw10 |
| P29218 | Pw10 |
| P02774 | Pw10 |
| P27338 | Pw10 |
| P02652 | Pw10 |
| Q16539 | Pw11 |
| P28482 | Pw11 |
| P49137 | Pw11 |
| P28482 | Pw12 |
| P12931 | Pw12 |
| P10275 | Pw12 |
| P52895 | Pw13 |
| P15121 | Pw13 |
| P14061 | Pw13 |
| P02768 | Pw13 |
| P14324 | Pw13 |
| P02774 | Pw13 |
| Q16539 | Pw14 |
| P28482 | Pw14 |
| P45983 | Pw14 |
| P49137 | Pw14 |
| P00915 | Pw15 |
| P00918 | Pw15 |
| P28482 | Pw16 |
| P12931 | Pw16 |
| P10275 | Pw16 |
| Q16539 | Pw17 |
| P12931 | Pw17 |
| P49137 | Pw17 |

|        |      |
|--------|------|
| Q16539 | Pw18 |
| P10828 | Pw18 |
| P28482 | Pw18 |
| P50613 | Pw18 |
| P12643 | Pw18 |
| P12931 | Pw18 |
| P10275 | Pw18 |
| P37231 | Pw18 |
| Q92731 | Pw18 |
| P24941 | Pw18 |
| P45452 | Pw18 |
| P03372 | Pw18 |
| P06401 | Pw18 |
| P08235 | Pw18 |
| O14757 | Pw18 |
| O14965 | Pw18 |
| Q15078 | Pw18 |
| Q16539 | Pw19 |
| P28482 | Pw19 |
| P45983 | Pw19 |
| P49137 | Pw19 |
| P04745 | Pw20 |
| Q13126 | Pw21 |
| P00915 | Pw21 |
| P62937 | Pw21 |
| Q16539 | Pw22 |
| P45983 | Pw22 |
| Q16539 | Pw23 |
| P28482 | Pw23 |
| P12931 | Pw23 |
| P49137 | Pw23 |
| P00915 | Pw24 |
| P00918 | Pw24 |
| P00915 | Pw25 |
| P00918 | Pw25 |
| P00915 | Pw26 |
| P00918 | Pw26 |
| Q16539 | Pw27 |
| P28482 | Pw27 |
| P24941 | Pw27 |
| P45983 | Pw27 |
| P49137 | Pw27 |
| P09211 | Pw27 |
| P10275 | Pw27 |

|        |      |
|--------|------|
| P06401 | Pw27 |
| P08235 | Pw27 |
| Q16539 | Pw28 |
| P28482 | Pw28 |
| P45983 | Pw28 |
| P49137 | Pw28 |
| Q16539 | Pw29 |
| P28482 | Pw29 |
| P45983 | Pw29 |
| P49137 | Pw29 |
| Q16539 | Pw30 |
| P28482 | Pw30 |
| P45983 | Pw30 |
| P49137 | Pw30 |
| Q16539 | Pw31 |
| P28482 | Pw31 |
| P45983 | Pw31 |
| P49137 | Pw31 |
| P08758 | Pw32 |
| Q16539 | Pw32 |
| P62937 | Pw32 |
| P28482 | Pw32 |
| P18031 | Pw32 |
| P02768 | Pw32 |
| P12931 | Pw32 |
| Q16539 | Pw33 |
| P28482 | Pw33 |
| P45983 | Pw33 |
| P49137 | Pw33 |
| Q16539 | Pw34 |
| P28482 | Pw34 |
| P45983 | Pw34 |
| P49137 | Pw34 |
| Q16539 | Pw35 |
| P28482 | Pw35 |
| P45983 | Pw35 |
| P49137 | Pw35 |
| Q16539 | Pw36 |
| P28482 | Pw36 |
| P45983 | Pw36 |
| P49137 | Pw36 |
| Q16539 | Pw37 |
| P28482 | Pw37 |
| P45983 | Pw37 |

|        |      |
|--------|------|
| P49137 | Pw37 |
| P28482 | Pw38 |
| P12931 | Pw38 |
| Q16539 | Pw39 |
| P45983 | Pw39 |
| P12931 | Pw39 |
| Q16539 | Pw40 |
| P28482 | Pw40 |
| P45983 | Pw40 |
| P49137 | Pw40 |
| Q16539 | Pw41 |
| P28482 | Pw41 |
| P45983 | Pw41 |
| P49137 | Pw41 |
| Q16539 | Pw42 |
| P28482 | Pw42 |
| P45983 | Pw42 |
| P49137 | Pw42 |
| Q16539 | Pw43 |
| P28482 | Pw43 |
| P45983 | Pw43 |
| P49137 | Pw43 |
| Q16539 | Pw44 |
| P28482 | Pw44 |
| P45983 | Pw44 |
| P49137 | Pw44 |
| Q16539 | Pw45 |
| P28482 | Pw45 |
| P45983 | Pw45 |
| P49137 | Pw45 |
| P19367 | Pw46 |
| P15086 | Pw47 |
| P12821 | Pw47 |
| Q16539 | Pw48 |
| P24941 | Pw48 |
| O14757 | Pw48 |
| Q15078 | Pw48 |
| O14965 | Pw48 |
| Q16539 | Pw49 |
| P28482 | Pw49 |
| P18031 | Pw49 |
| P45983 | Pw49 |
| P03372 | Pw49 |
| P49137 | Pw49 |

|        |      |
|--------|------|
| P12931 | Pw49 |
| O14757 | Pw49 |
| P06401 | Pw49 |
| Q16539 | Pw50 |
| P28482 | Pw50 |
| P24941 | Pw50 |
| P45983 | Pw50 |
| P49137 | Pw50 |
| P10275 | Pw51 |
| P08235 | Pw51 |
| P06401 | Pw51 |
| Q13126 | Pw52 |
| P00915 | Pw52 |
| P62937 | Pw52 |

---
